# Supplementary material for: Meta-Analysis of the Immunogenicity and Tolerability of Pandemic Influenza A 2009 (H1N1) Vaccines
Source: PubMed Central journal article supplement (PMC3167852; doi:10.1371/journal.pone.0024384), 2011-09-06
Supplement: pone.0024384.s001.pdf [file pone.0024384.s001.pdf]

**Table S1.** Characteristics of published studies investigating the immunogenicity and/or safety of 2009 H1N1 influenza vaccination.

| First Author                | Study Year | Country    | Design               | Age, years | Vaccine type                      | Dose given (n) in each arm*                                                                                                         | Main outcomes extracted **                | Quality *** | Sponsor                |
|-----------------------------|------------|------------|----------------------|------------|-----------------------------------|-------------------------------------------------------------------------------------------------------------------------------------|-------------------------------------------|-------------|------------------------|
| <b>RCTs</b>                 |            |            |                      |            |                                   |                                                                                                                                     |                                           |             |                        |
| Arguedas [8,54,56]          | 2009       | Costa Rica | RCT, No blinding     | 3-17       | Inactivated, Surface-antigen      | 7.5+OA (54); 15 (83); 30 (57)                                                                                                       | HI; Fever; Pain; Systemic any; Local any. | 0, 0, 0     | Novartis               |
| Cheong [11]                 | 2009       | Korea      | RCT Single blind     | >=19       | Inactivated, Split virus          | 15 (226); 30 (228)                                                                                                                  | HI; Fever; Pain.                          | 0, 0, 1     | Non-profit Institution |
| Clarck [12]                 | 2009       | UK         | RCT, No blinding     | 18-50      | Inactivated, Surface-antigen      | 3.75+OA (25); 7.5 (25); 7.5+OA (51); 15 (25); 15+OA (25)                                                                            | HI; Fever; Pain.                          | 0, 0, 1     | Novartis               |
| Gasparini 1 [55]            | 2009       | Italy      | RCT, No blinding     | >=18       | Inactivated, Surface-antigen      | 3.75+OA (69); 7.5+OA (141)                                                                                                          | HI; Fever; Pain.                          | 0, 0, 0     | Novartis               |
| Greenberg [15,59]           | 2009       | Australia  | RCT, Single blind    | 18-64      | Inactivated, Split virus          | 15 (117); 30 (115)                                                                                                                  | HI; Fever; Pain; Systemic any; Local any. | 1, 1, 1     | CSL                    |
| Kung / Kao [17,18]          | 2009       | Taiwan     | RCT, Single blind    | 20-86      | Inactivated, Split virus          | 15 (173); 30 (115)                                                                                                                  | HI; Fever; Pain; Systemic any; Local any. | 1, 1, 1     | Adimmune               |
| Liang / Zhu / Wu [19,36,38] | 2009       | China      | 2 RCTs, Double blind | 3-87       | Inactivated, Split virus $\sigma$ | Placebo (1432); 5+AI (99) $\sigma$ ; 7.5 (920); 7.5+AI (717); 10+AI (202) $\sigma$ ; 15 (4326); 15+AI (714); 30 (3419); 30+AI (318) | HI; Systemic any; Local any.              | 1, 1, 0     | Hualan BB, Sinovac     |
| Mallory [23]                | 2009       | USA        | 2 RCTs, Double blind | 2-49       | Live-attenuated Whole virus       | Placebo (128); 1.875+OA (514);                                                                                                      | HI $\beta$ ; Systemic any; Fever.         | 1, 1, 1     | MedImmune              |
| Mironov 1 [24]              | 2009       | Russia     | RCT No blinding      | 18-60      | Inactivated, Split virus          | Placebo (10); Not reported (20)                                                                                                     | Systemic any, local any                   | 0, 0, 1     | NPO Microgen           |
| Mironov 2 [24]              | 2009       | Russia     | RCT No blinding      | 18-60      | Intranasal, Whole virus           | Placebo (10); Not reported (20)                                                                                                     | Systemic any, local any                   | 0, 0, 1     | NPO Microgen           |
| Nicholson [25]              | 2009       | UK         | RCT, Single blind    | >=18       | Inactivated, Whole vs split virus | 3.75+OA (170); 7.5 (171) $\sigma$                                                                                                   | HI; Fever; Pain.                          | 1, 1, 1     | Non-profit Institution |
| Nolan [26,59]               | 2009       | Australia  | RCT, Single blind    | 0.5-9      | Inactivated, Split virus          | 15 (174); 30 (172)                                                                                                                  | HI; Fever; Pain; Systemic any; Local any. | 1, 1, 1     | CSL                    |
| Plennevaux [28,29]          | 2009       | USA        | 2 RCTs Single-blind  | >=0.5      | Inactivated, Split virus          | Placebo (145); 7.5 (445); 15 (445); 30 (242)                                                                                        | HI; Fever; Pain; Systemic any; Local any. | 1, 1, 1     | Sanofi                 |
| Roman 1 [30]                | 2009       | Germany    | RCT Single blind     | 18-60      | Inactivated, Split virus          | 5.25+OA (56); 21 (61)                                                                                                               | HI; Fever; Pain.                          | 1, 1, 1     | GSK                    |
| Roman 3 [39]                | 2009       | Belgium    | 2 RCTs Single blind  | 18-60      | Inactivated, Split virus          | 3.75 (63); 3.75+OA (124); 15 (66)                                                                                                   | HI; Pain.                                 | 0,1,1       | GSK                    |
| Talaat [33]                 | 2009       | USA        | RCT Single blind     | 18-93      | Inactivated, Split virus          | Placebo (97); 7.5 (401); 15 (394); 30 (400)                                                                                         | HI; Fever; Pain; Systemic any; Local any. | 0, 0, 1     | CSL                    |
| Waddington [35]             | 2009       | UK         | RCT No blinding      | 0.5-12     | Inactivated, Whole vs split virus | 1.875+OA (392); 7.5 (414) $\sigma$                                                                                                  | HI; Fever; Pain; Local any.               | 1, 1, 1     | Non-profit Institution |

|                                                              |      |         |                             |           |                                 |                              |                                              |           |                           |
|--------------------------------------------------------------|------|---------|-----------------------------|-----------|---------------------------------|------------------------------|----------------------------------------------|-----------|---------------------------|
| Yasuda [37]                                                  | 2009 | Japan   | RCT<br>No blinding          | 0.5-19    | Inactivated,<br>Surface-antigen | 3.75+OA (57); 7.5+OA (59)    | HI; Fever; Pain.                             | 0, 0, 1   | Novartis                  |
| <b>Single-arm <math>\phi</math> or non-randomized trials</b> |      |         |                             |           |                                 |                              |                                              |           |                           |
| Carmona [9]                                                  | 2009 | Spain   | Single arm $\phi$           | 0.5-3     | Inactivated,<br>Split virus     | 1.875+OA (101); 3.75+OA (50) | HI; Fever; Pain; Systemic any;<br>Local any. | --, --, 0 | GSK                       |
| Di [13]                                                      | 2009 | China   | Single arm                  | 19-55     | Inactivated,<br>Split virus     | 7.5 (95)                     | HI.                                          | --, --, 0 | Not reported              |
| Esposito [14]                                                | 2009 | Italy   | Single arm $\phi$           | 9-20      | Inactivated,<br>Surface-antigen | 7.5+OA (36)                  | HI; Fever; Pain; Systemic any;<br>Local any. | --, --, 1 | Non-profit<br>Institution |
| Gasparini 2 [55]                                             | 2009 | Italy   | Single arm                  | $\geq 18$ | Inactivated,<br>Surface-antigen | 7.5+OA (154)                 | HI; Fever; Pain.                             | --, --, 0 | Novartis                  |
| Igari [57]                                                   | 2009 | Japan   | Single arm                  | 20-64     | Inactivated,<br>Split virus     | 15 (389)                     | HI; Fever; Pain; Systemic any;<br>Local any. | --, --, 1 | Non-profit<br>Institution |
| Ikematsu [16]                                                | 2009 | Japan   | Single arm                  | 20-64     | Inactivated,<br>Split virus     | 3.75+OA (100); 15 (69)       | HI; Fever; Pain.                             | --, --, 1 | GSK                       |
| Loebermann [20]                                              | 2010 | Germany | Single arm                  | $\geq 18$ | Inactivated,<br>Split virus     | 15 (69)                      | HI; Pain.                                    | --, --, 1 | Novartis                  |
| Lu [21]                                                      | 2009 | Taiwan  | No randomiz.<br>No blinding | 1-17      | Inactivated,<br>Split virus     | 7.5 (58); 15 (122)           | HI; Fever; Pain; Systemic any;<br>Local any. | --, --, 1 | Adimmune                  |
| Oh [27]                                                      | 2009 | Korea   | No randomiz.<br>No blinding | 0.5-17    | Inactivated,<br>Split virus     | 7.5 (34); 15 (212)           | HI; Fever; Pain.                             | --, --, 1 | Non-profit<br>Institution |
| Roman 2 [31]                                                 | 2009 | Belgium | Single arm $\phi$           | 18-85     | Inactivated,<br>Split virus     | 3.75+OA (237)                | HI; Fever; Pain.                             | --, --, 0 | GSK                       |
| Scheifele [58]                                               | 2009 | Canada  | Single arm                  | 0.5-3     | Inactivated,<br>Split virus     | 1.875+OA (152)               | HI; Fever; Pain; Systemic any;<br>Local any. | --, --, 0 | Non-profit<br>Institution |
| Sun [32]                                                     | 2009 | China   | Single arm                  | 18-60     | Inactivated,<br>Split virus     | 15 (58)                      | HI.                                          | --, --, 1 | Hualan BB                 |
| Vajo [34]                                                    | 2009 | Hungary | Single arm $\phi$           | $\geq 18$ | Inactivated,<br>Whole virus     | 5+AI (352)                   | HI; Fever; Pain; Systemic any;<br>Local any. | --, --, 1 | Omninvest                 |
| Madhun [22]                                                  | 2010 | Norway  | Single arm                  | 21-67     | Inactivated,<br>Split virus     | 3.75+OA (207)                | HI; Fever; Pain; Systemic any;<br>Local any. | --, --, 1 | Non-profit<br>Institution |

\* The dose shown refers to the amount of hemagglutinin antigen in micrograms; when two doses were administered at baseline, the total dose was doubled; AI = Aluminum adjuvant (Aluminum hydroxide or Aluminum phosphate); OA = Other adjuvant, either MF-59 [8,12,14,37,54,55], or AS03 [9,16,22,25,30,31,35,58]; In brackets the total n. of individuals in which immunogenicity (or safety for studies not assessing immunogenicity) was fully evaluated after the first dose (or the second if the results after the first dose were not reported). \*\* HI = Immunogenicity assessed using hemagglutination-inhibition technique. \*\*\* Based upon the methodology described by Juni and coll. [42], the first number pertains to random generation of allocation sequences (0=non adequate; 1=adequate); the second to allocation concealment; the third to withdrawals/dropouts rate/description.  $\phi$  These trials randomized participants into different groups, but for the aims of our analysis they were to be considered as single group trials (i.e. patients receiving two different doses both below 6  $\mu$ g of HA; or patients randomized to receive either seasonal vaccine + pandemic vaccine, or the same pandemic vaccine only).  $\sigma$  Whole-virus vaccine.  $\beta$  This outcome was evaluated only in a subset of subjects.
