# Supplementary material for: Meta-Analysis of the Immunogenicity and Tolerability of Pandemic Influenza A 2009 (H1N1) Vaccines
Source: PubMed Central journal article supplement (PMC3167852; doi:10.1371/journal.pone.0024384), 2011-09-06
Supplement: pone.0024384.s002.pdf [file pone.0024384.s002.pdf]

**Table S2. Rates of seroconversion (according to hemagglutination-inhibition) after the first or single dose of 2009 H1N1 vaccine in each of the retrieved studies.**

| Study<br>(first author, reference) | 1.88-5.25<br>% (n) | 1.88-5.25 +<br>Oil-in-water<br>% (n) | 1.88-5.25 +<br>Aluminum<br>% (n) | 7.5<br>% (n) | 7.5 +<br>Aluminum<br>% (n) | 7.5 +<br>Oil-in-water<br>% (n) | 15<br>% (n) | 15 +<br>Aluminum<br>% (n) | 15 +<br>Oil-in-water<br>% (n) | 21-30<br>% (n) |
|------------------------------------|--------------------|--------------------------------------|----------------------------------|--------------|----------------------------|--------------------------------|-------------|---------------------------|-------------------------------|----------------|
| <b><u>ADULTS - RCTs</u></b>        |                    |                                      |                                  |              |                            |                                |             |                           |                               |                |
| Greenberg [15]                     |                    |                                      |                                  |              |                            |                                | 74 (120)    |                           |                               | 82 (119)       |
| Clark [12]                         |                    | 88 (25)                              |                                  | 72 (25)      |                            | 71 (51)                        | 52 (25)     |                           | 88 (25)                       |                |
| Roman 1 [30]                       |                    | 98 (56)                              |                                  |              |                            |                                |             |                           |                               | 95 (61)        |
| Plennevaux [29]                    |                    |                                      |                                  | 92 (140)     |                            |                                | 96 (145)    |                           |                               | 97 (144)       |
| Liang [19]                         |                    |                                      | 75 (99)                          | 88 (323)     | 72 (208)                   |                                | 93 (137)    | 82 (202)                  |                               | 93 (991)       |
| Kung [18]                          |                    |                                      |                                  |              |                            |                                | 92 (120)    |                           |                               | 92 (62)        |
| Talaat [33]                        |                    |                                      |                                  | 82 (200)     |                            |                                | 88 (196)    |                           |                               | 95 (200)       |
| Cheong [11]                        |                    |                                      |                                  |              |                            |                                | 89 (115)    |                           |                               | 95 (115)       |
| Nicholson [25]                     |                    | 81 (133)                             |                                  | 48 (137)*    |                            |                                |             |                           |                               |                |
| Gasparini [55]                     |                    | 91 (69)                              |                                  |              |                            | 94 (141)                       |             |                           |                               |                |
| Roman 3A [39]                      |                    |                                      |                                  |              |                            |                                | 85 (66)     |                           |                               |                |
| Roman 3B [39]                      | 70 (63)            | 94 (64)                              |                                  |              |                            |                                |             |                           |                               |                |
| <b><u>ADULTS - Trials</u></b>      |                    |                                      |                                  |              |                            |                                |             |                           |                               |                |
| Roman 2 [39]                       |                    | 95 (118)                             |                                  |              |                            |                                |             |                           |                               |                |
| Vajo [34]                          |                    |                                      | 76 (200)                         |              |                            |                                |             |                           |                               |                |
| Di Adults [13]                     |                    |                                      |                                  | 82 (95)      |                            |                                |             |                           |                               |                |
| Ikematsu [16]                      |                    | 94 (100)                             |                                  |              |                            |                                |             |                           |                               |                |
| Loebermann [20]                    |                    |                                      |                                  |              |                            |                                | 84 (69)     |                           |                               |                |
| Sun [32]                           |                    |                                      |                                  |              |                            |                                | 86 (58)     |                           |                               |                |
| Madhun [22]                        |                    | 88 (207)                             |                                  |              |                            |                                |             |                           |                               |                |
| Igari [57]                         |                    |                                      |                                  |              |                            |                                | 35 (389)    |                           |                               |                |
| Gasparini [55]                     |                    |                                      |                                  |              |                            | 94 (50)                        |             |                           |                               |                |
| <b><u>ELDERLY - RCTs</u></b>       |                    |                                      |                                  |              |                            |                                |             |                           |                               |                |
| Plennevaux [29]                    |                    |                                      |                                  | 83 (95)      |                            |                                | 89 (100)    |                           |                               | 92 (98)        |
| Liang [19]                         |                    |                                      |                                  | 80 (147)     | 57 (108)                   |                                | 84 (842)    | 75 (108)                  |                               | 91 (679)       |
| Kao <sup>(17)</sup>                |                    |                                      |                                  |              |                            |                                | 72 (53)     |                           |                               | 81 (53)        |
| Talaat [33]                        |                    |                                      |                                  | 51 (201)     |                            |                                | 59 (198)    |                           |                               | 73 (200)       |
| Cheong [11]                        |                    |                                      |                                  |              |                            |                                | 57 (111)    |                           |                               | 75 (113)       |
| Nicholson [25]                     |                    | 51 (37)                              |                                  | 29 (34)*     |                            |                                |             |                           |                               |                |
| <b><u>ELDERLY - Trials</u></b>     |                    |                                      |                                  |              |                            |                                |             |                           |                               |                |

|                 |          |          |  |          |         |  |
|-----------------|----------|----------|--|----------|---------|--|
| Roman 2 [39]    | 79 (119) |          |  |          |         |  |
| Vajo [34]       |          | 70 (152) |  |          |         |  |
| Loebermann [20] |          |          |  |          | 75 (63) |  |
| Gasparini [55]  |          |          |  | 73 (154) |         |  |

#### **ADOLESCENTS - RCTs**

|                    |         |          |          |         |           |          |
|--------------------|---------|----------|----------|---------|-----------|----------|
| Arguedas [8,54,56] |         |          |          | 87 (45) | 88 (77)   | 94 (52)  |
| Liang [19]         |         | 96 (218) | 80 (203) |         | 96 (1091) | 89 (204) |
| Yasuda [37]        | 62 (29) |          |          | 79 (29) |           |          |

#### **ADOLESCENTS - Trials**

|               |  |  |  |          |          |  |
|---------------|--|--|--|----------|----------|--|
| Lu [21]       |  |  |  |          | 84 (31)  |  |
| Esposito [14] |  |  |  | 100 (36) |          |  |
| Oh [27]       |  |  |  |          | 78 (129) |  |

#### **CHILDREN - RCTs**

|                            |         |          |          |         |           |          |
|----------------------------|---------|----------|----------|---------|-----------|----------|
| Arguedas [8,54,56]         |         |          |          | 91 (46) | 69 (75)   | 75 (48)  |
| Plennevaux <sup>(28)</sup> |         | 56 (210) |          |         | 63 (200)  |          |
| Liang [19]                 |         | 77 (232) | 56 (198) |         | 81 (1113) | 73 (200) |
| Nolan [26,59]              |         |          |          |         | 87 (174)  | 94 (172) |
| Yasuda [37]                | 50 (28) |          |          | 77 (30) |           |          |

#### **CHILDREN - Trials**

|                |          |         |  |  |         |  |
|----------------|----------|---------|--|--|---------|--|
| Lu [21]        |          | 28 (58) |  |  | 45 (91) |  |
| Oh [27]        |          | 15 (34) |  |  | 33 (83) |  |
| Carmona [9]    | 99 (149) |         |  |  |         |  |
| Scheifele [58] | 84 (152) |         |  |  |         |  |

\* Whole-virion vaccine. Studies reported in red have been sponsored by not-for-profit institutions. All other studies have been sponsored by vaccine manufacturers.
