# Supplementary material for: Meta-Analysis of the Immunogenicity and Tolerability of Pandemic Influenza A 2009 (H1N1) Vaccines
Source: PubMed Central journal article supplement (PMC3167852; doi:10.1371/journal.pone.0024384), 2011-09-06
Supplement: pone.0024384.s003.pdf [file pone.0024384.s003.pdf]

**Table S3. Rates of seroconversion (according to hemagglutination-inhibition) after two doses of 2009 H1N1 vaccine in each of the retrieved studies.**

| Study<br>(first author, reference) | 1.88-5.25<br>% (n) | 1.88-5.25 +<br>Oil-in-water<br>% (n) | 1.88-5.25 +<br>Aluminum<br>% (n) | 7.5<br>% (n) | 7.5 +<br>Aluminum<br>% (n) | 7.5 +<br>Oil-in-water<br>% (n) | 15<br>% (n) | 15 +<br>Aluminum<br>% (n) | 15 +<br>Oil-in-water<br>% (n) | 21-30<br>% (n) |
|------------------------------------|--------------------|--------------------------------------|----------------------------------|--------------|----------------------------|--------------------------------|-------------|---------------------------|-------------------------------|----------------|
| <b><u>ADULTS - RCTs</u></b>        |                    |                                      |                                  |              |                            |                                |             |                           |                               |                |
| Greenberg [15]                     |                    |                                      |                                  |              |                            |                                | 82 (117)    |                           |                               | 90 (115)       |
| Clark [12]                         |                    | 92 (25)                              |                                  | 78 (23)      |                            | 92 (24)                        | 75 (24)     |                           |                               |                |
| Roman 1 [30]                       |                    | 100 (56)                             |                                  |              |                            |                                |             |                           |                               | 98 (61)        |
| Liang [19]                         |                    |                                      | 79 (98)                          | 97 (309)     | 81 (200)                   |                                | 96 (1125)   | 94 (196)                  |                               | 97 (857)       |
| Kung [18]                          |                    |                                      |                                  |              |                            |                                | 93 (59)     |                           |                               | 92 (60)        |
| Cheong [11]                        |                    |                                      |                                  |              |                            |                                | 89 (113)    |                           |                               | 94 (115)       |
| Nicholson [25]                     |                    | 91 (129)                             |                                  | 53 (133)*    |                            |                                |             |                           |                               |                |
| Roman 3A [39]                      |                    | 98 (59)                              |                                  |              |                            |                                | 92 (66)     |                           |                               |                |
| Roman 3B [39]                      | 86 (63)            | 100 (64)                             |                                  |              |                            |                                |             |                           |                               |                |
| <b><u>ADULTS - Trials</u></b>      |                    |                                      |                                  |              |                            |                                |             |                           |                               |                |
| Roman 2 [39]                       |                    | 98 (66)                              |                                  |              |                            |                                |             |                           |                               |                |
| Ikematsu [16]                      |                    | 100 (100)                            |                                  |              |                            |                                |             |                           |                               |                |
| Mallory [23]**                     |                    | 15 (222)**                           |                                  |              |                            |                                |             |                           |                               |                |
| <b><u>ELDERLY - RCTs</u></b>       |                    |                                      |                                  |              |                            |                                |             |                           |                               |                |
| Liang [19]                         |                    |                                      |                                  | 88 (137)     | 86 (103)                   |                                | 96 (711)    | 85 (101)                  |                               | 97 (144)       |
| Kung [18]                          |                    |                                      |                                  |              |                            |                                | 71 (52)     |                           |                               | 80 (51)        |
| Cheong [11]                        |                    |                                      |                                  |              |                            |                                | 59 (109)    |                           |                               | 78 (111)       |
| Nicholson [25]                     |                    | 73 (37)                              |                                  | 33 (33)*     |                            |                                |             |                           |                               |                |
| <b><u>ELDERLY - Trials</u></b>     |                    |                                      |                                  |              |                            |                                |             |                           |                               |                |
| Roman 2 [39]                       |                    | 94 (67)                              |                                  |              |                            |                                |             |                           |                               |                |
| <b><u>ADOLESCENTS - RCTs</u></b>   |                    |                                      |                                  |              |                            |                                |             |                           |                               |                |
| Arguedas [8,54,56]                 |                    |                                      |                                  |              |                            | 84 (45)                        | 91 (77)     |                           |                               | 92 (52)        |
| Liang [19]                         |                    |                                      |                                  | 99 (195)     | 89 (192)                   |                                | 99 (917)    | 95 (183)                  |                               | 99 (717)       |
| Yasuda [37]                        |                    | 100 (29)                             |                                  |              |                            | 100 (29)                       |             |                           |                               |                |
| <b><u>ADOLESCENTS - Trials</u></b> |                    |                                      |                                  |              |                            |                                |             |                           |                               |                |
| Lu [21]                            |                    |                                      |                                  |              |                            |                                | 87 (31)     |                           |                               |                |

|         |  |  |  |          |
|---------|--|--|--|----------|
| Oh [27] |  |  |  | 86 (126) |
|---------|--|--|--|----------|

**CHILDREN - RCTs**

|                    |          |           |          |          |          |
|--------------------|----------|-----------|----------|----------|----------|
| Arguedas [8,54,56] |          |           | 96 (46)  | 84 (75)  | 92 (48)  |
| Plennevaux (28)    | 93 (190) |           |          | 99 (178) |          |
| Liang [19]         | 98 (220) | 93 (195)  |          | 98 (178) | 97 (194) |
| Nolan [26,59]      |          |           |          | 98 (159) | 98 (165) |
| Waddington (35)    | 99 (392) | 77 (414)* |          |          |          |
| Yasuda [37]        | 100 (28) |           | 100 (30) |          |          |

**CHILDREN - Trials**

|                |            |         |  |         |
|----------------|------------|---------|--|---------|
| Lu [21]        |            | 75 (57) |  | 80 (91) |
| Oh [27]        |            | 56 (34) |  | 62 (82) |
| Carmona [9]    | 100 (147)  |         |  |         |
| Scheifele [58] | 99 (146)   |         |  |         |
| Mallory [23]** | 28 (143)** |         |  |         |

---

\* Whole-virion vaccine. \*\* Live-attenuated vaccine. Studies reported in red have been sponsored by not-for-profit institutions. All other studies have been sponsored by vaccine manufacturers.
