# Supplementary material for: Meta-Analysis of the Immunogenicity and Tolerability of Pandemic Influenza A 2009 (H1N1) Vaccines
Source: PubMed Central journal article supplement (PMC3167852; doi:10.1371/journal.pone.0024384), 2011-09-06
Supplement: pone.0024384.s004.pdf [file pone.0024384.s004.pdf]

**Table S4. Rates of seroconversion \* after H1N1 influenza vaccination, according to vaccine dose (in µg of hemagglutinin antigen) and formulation (presence or absence of an adjuvant; one administration or two). Data from single studies have been combined using proportion meta-analysis (random-effect model). Non randomized and randomized trials were included.**

| Formulations**               | % (95%CI)               | Adults <sup>1</sup> |                                    | Elderly <sup>2</sup>    |         | Adolescents <sup>3</sup> |              | Children <sup>4</sup> |              | All ages<br>% (95%CI) |      |                       |             |
|------------------------------|-------------------------|---------------------|------------------------------------|-------------------------|---------|--------------------------|--------------|-----------------------|--------------|-----------------------|------|-----------------------|-------------|
|                              |                         | % (95%CI)           | N (ref)                            | % (95%CI)               | N (ref) | % (95%CI)                | N (ref)      | % (95%CI)             | N (ref)      |                       |      |                       |             |
| <b>Non-adjuvanted</b>        |                         |                     |                                    |                         |         |                          |              |                       |              |                       |      |                       |             |
| 7.5x1 – All                  | 79 (65-90)              | 920                 | [12,13,19,25,29,33]                | 63 (41-82)              | 477     | [19,25,29,33]            | 96 (93-98)   | 218                   | [19]         | 44 (21-69)            | 534  | [19,21,27,29]         | 60 (45-73)  |
| - Split-virus                | 85 (80-90)              | 783                 |                                    | 72 (50-90)              | 443     |                          | 96 (93-98)   | 218                   |              | 44 (21-69)            | 534  |                       | 62 (47-75)  |
| - Whole-virus                | 48 (40-57)              | 137                 | [25]                               | 29 (15-47)              | 34      | [25]                     | --           | 0                     |              | --                    | 0    |                       | 44 (37-52)  |
| 7.5x2 – All                  | 79 (38-100)             | 465                 | [12,19,25]                         | 64 (11-100)             | 170     | [19,25]                  | 99 (96-100)  | 195                   | [19]         | 83 (68-94)            | 915  | [19,21,27,28,35]      | 77 (60-91)  |
| - Split-virus                | 90 (64-100)             | 332                 |                                    | 88 (82-93)              | 137     |                          | 99 (96-100)  | 195                   |              | 84 (67-96)            | 501  |                       | 83 (69-93)  |
| - Whole-virus                | 53 (45-62)              | 133                 | [25]                               | 33 (18-52)              | 33      | [25]                     | --           | 0                     |              | 77 (72-81)            | 414  | [35]                  | 64 (36-87)  |
| 15x1<br>(all split-virus)    | 81 (67-93)              | 2583                | [11,12,15,18,19,20,29,32,33,39,57] | 73 (61-84)              | 1367    | [11,17,19,20,29,33,38]   | 90 (78-97)   | 1334                  | [8,19,21,27] | 64 (47-79)            | 1754 | [8,19,21,26,27,29]    | 74 (65-83)  |
| 15x2<br>(all split-virus)    | 89 (82-95)              | 1504                | [11,12,15,18,19,39]                | 78 (44-98)              | 872     | [11,18,19,38]            | 92 (79-99)   | 1151                  | [8,19,21,27] | 90 (79-97)            | 1556 | [8,19,21,26,27,29,54] | 88 (80-94)  |
| 21-30x1<br>(all split-virus) | 93 (90-95)              | 1692                | [11,15,18,19,29,30,33]             | 83 (73-91)              | 1143    | [11,17,19,29,33]         | 98 (96-100)  | 920                   | [8,19]       | 87 (79-94)            | 1111 | [8,19,26]             | 89 (86-92)  |
| 21-30x2<br>(all split-virus) | 94 (91-97)              | 1147                | [11,15,18,19,30]                   | 87 (67-98)              | 716     | [11,18,19,38]            | 97 (86-100)  | 769                   | [8,19]       | 97 (94-99)            | 969  | [8,19,26,54]          | 93 (88-97)  |
| <b>Adjuvanted</b>            |                         |                     |                                    |                         |         |                          |              |                       |              |                       |      |                       |             |
| 1.88-5.25x1 – All            | 89 (84-94)              | 1131                | [12,16,19,22,25,30,31,34,39,55]    | 69 (56-80)              | 308     | [25,31,34]               | 62 (42-79)   | 29                    | [37]         | 82 (55-98)            | 329  | [9,37,58]             | 87 (81-92)  |
| - Aluminum                   | 76 (71-80) <sup>§</sup> | 299                 | [19,34]                            | 70 (62-78) <sup>§</sup> | 152     | [34]                     | --           | 0                     |              | --                    | 0    |                       | 74 (70-78)  |
| - Other adjuvants            | 92 (88-95)              | 832                 |                                    | 66 (38-89)              | 156     |                          | 62 (42-79)   | 29                    |              | 82 (55-98)            | 329  |                       | 89 (83-94)  |
| 1.88-5.25x2 – All            | 96 (90-99)              | 597                 | [12,16,19,25,30,31,39]             | 85 (60-99)              | 104     | [25,31]                  | 100 (88-100) | 29                    | [37]         | 99 (98-100)           | 713  | [9,35,37,58]          | 97 (94-99)  |
| - Aluminum                   | 79 (69-86)              | 98                  | [19]                               | --                      | 0       |                          | --           | 0                     |              | --                    | 0    |                       | 79 (69-86)  |
| - Other adjuvants            | 98 (94-100)             | 499                 |                                    | 85 (60-99)              | 104     |                          | 100 (88-100) | 29                    |              | 99 (98-100)           | 713  |                       | 98 (96-100) |
| 7.5x1 – All                  | 80 (60-94)              | 450                 | [12,19,55]                         | 65 (50-79)              | 262     | [19,55]                  | 91 (76-99)   | 320                   |              | 76 (48-95)            | 292  | [8,19,37]             | 83 (71-93)  |

|                   |            |             |            |             |             |               |             |                 | [8,14,19,37] |
|-------------------|------------|-------------|------------|-------------|-------------|---------------|-------------|-----------------|--------------|
| - Aluminum [19]   | 72 (65-78) | 208         | 57 (48-67) | 108         | 80 (74-85)  | 203           | 56 (49-63)  | 198             | 68 (64-71)   |
| - Other adjuvants | 84 (56-99) | 242         | 73 (65-80) | 154         | 94 (80-100) | 117           | 85 (67-97)  | 84              | 86 (74-95)   |
| 7.5x2 – All       | 83 (74-91) | 224 [12,19] | 86 (79-92) | 103 [19,38] | 91 (81-98)  | 266 [8,19,37] | 95 (90-98)  | 271[8,19,37,54] | 93 (84-98)   |
| - Aluminum [19]   | 81 (75-86) | 200         | 86 (79-92) | 103         | 89 (83-93)  | 192           | 93 (88-96)  | 195             | 87 (85-90)   |
| - Other adjuvants | 92 (73-99) | 24          | --         | 0           | 93 (70-100) | 74            | 97 (91-100) | 76              | 95 (84-100)  |
| 15x1 – All        | 83 (77-87) | 227 [12,19] | 75 (66-83) | 108 [19,38] | 89 (84-93)  | 204 [19]      | 73 (66-97)  | 200 [19]        | 81 (78-83)   |
| - Aluminum        | 82 (76-87) | 202 [19]    | 75 (66-83) | 108         | 89 (84-93)  | 204           | 73 (66-97)  | 200             | 80 (77-83)   |
| - Other adjuvants | 88 (69-97) | 25          | --         | 0           | --          | 0             | --          | 0               | 88 (69-97)   |
| 15x2 All Aluminum | 94 (90-97) | 196 [19]    | 85 (77-91) | 101 [19,38] | 94 (90-97)  | 183 [19]      | 97 (94-99)  | 194 [19]        | 94 (92-95)   |

N = total number of subject analyzed; (ref) = References to included studies; CI = Confidence Intervals; <sup>1</sup> Adults = from 18 to 64 years; <sup>2</sup> Elderly = from 65 years; <sup>3</sup> Adolescents = from 10 to 17 years; <sup>4</sup> Children = from 6 months to 9 years (see Table S1 for several exceptions). \* Seroconversion = subjects with a pre-vaccination hemagglutination-inhibition antibody titer  $\leq 1:10$  and a post-vaccination titer  $\geq 1:40$ , or a pre-vaccination titer  $\geq 1:10$  and an increase in the titer by a factor of four or more after vaccination. \*\* 7.5x1 = Results collected after the first or single dose of 7.5 $\mu$ g; 7.5x2 = Results collected after the second dose of 7.5 $\mu$ g. <sup>5</sup> Whole-virus only.
