# Supplementary material for: Meta-Analysis of the Immunogenicity and Tolerability of Pandemic Influenza A 2009 (H1N1) Vaccines
Source: PubMed Central journal article supplement (PMC3167852; doi:10.1371/journal.pone.0024384), 2011-09-06
Supplement: pone.0024384.s005.pdf [file pone.0024384.s005.pdf]

**Table S5.** Adverse events: Methods of assessment, definitions and reporting issues of each included trial.

| <b>Trials</b>      | <b>Fever</b>                                                                                       | <b>Pain at injection site</b>                                                                                                                                                                                                                                   | <b>Any local adverse event</b>                                              | <b>Any systemic adverse event</b>                                                                                         | <b>Method of assessment</b>          | <b>Reporting issues</b>                                                                                                                                                                                                                    |
|--------------------|----------------------------------------------------------------------------------------------------|-----------------------------------------------------------------------------------------------------------------------------------------------------------------------------------------------------------------------------------------------------------------|-----------------------------------------------------------------------------|---------------------------------------------------------------------------------------------------------------------------|--------------------------------------|--------------------------------------------------------------------------------------------------------------------------------------------------------------------------------------------------------------------------------------------|
| Arguedas [8,54]    | Axillary temp. >38 °C                                                                              | Mild: did not interfere with activity<br>Moderate: caused some impairment<br>Severe: affected daily activity and required medical attention                                                                                                                     | Any local reaction among: erythema, induration, swelling, pain              | Any systemic reaction among: headache, fatigue, myalgia, arthralgia, chills, nausea, vomiting, diarrhea, fever            | 7-day self-compiled diary card       | None                                                                                                                                                                                                                                       |
| Carmona [9]        | Axillary temp. ≥37.5 °C                                                                            | Grade 1: minor reaction on touching site<br>Grade 2: cries/protests on touching site<br>Grade 3: cries when limb moved/spontaneously painful                                                                                                                    | Any local reaction among: redness, swelling, pain                           | Any systemic reaction among: drowsiness, irritability, loss of appetite, fever                                            | 7-day diary card compiled by parents | None                                                                                                                                                                                                                                       |
| Cheong [11]        | NR                                                                                                 | Grade 1: does not interfere with activity<br>Grade 2: repeated use of non-narcotic pain reliever >24 h or interferes with activity<br>Grade 3: any use of narcotic pain reliever or prevents daily activity<br>Grade 4: emergency room visit or hospitalization | Any local reaction among: redness, swelling, pain, tenderness               | Any systemic reaction among: fever, headache, malaise, shivering, fatigue, sweating, myalgia, and arthralgia              | 7-day self-compiled diary card       | The dose to which the adverse events results were referred is not indicated. We assumed as both the doses were counted. Data on local any and systemic any adverse events could not be extracted (adverse events reported only singularly) |
| Clarck [12]        | Oral temp. >38 °C                                                                                  | Mild: did not interfere with activity<br>Moderate: caused some impairment<br>Severe: affected daily activity and required medical attention                                                                                                                     | Any local reaction among: pain, bruising, erythema, and swelling            | Any systemic reaction among: chills, malaise, muscle aches, nausea, and headache                                          | 7-day self-compiled diary card       | Data on any local and systemic adverse events could not be extracted (adverse events reported only singularly)                                                                                                                             |
| Di [13]            | NR                                                                                                 | NR                                                                                                                                                                                                                                                              | NR                                                                          | NR                                                                                                                        | NR                                   | No data on adverse events have been reported                                                                                                                                                                                               |
| Esposito [14]      | Axillary temp. ≥38 °C                                                                              | Mild: did not interfere with activity<br>Moderate: caused some impairment<br>Severe: affected daily activity and required medical attention                                                                                                                     | Any local reaction among: erythema, swelling/induration, pain               | Any systemic reaction among: irritability, sleepiness, changes in eating habits, vomiting, diarrhea, malaise, muscle ache | 14-day self-compiled diary card      | None                                                                                                                                                                                                                                       |
| Gasparini 1,2 [55] | NR                                                                                                 | NR                                                                                                                                                                                                                                                              | Any local reaction among: ecchymosis, induration, erythema, swelling, pain  | Any systemic reaction among: chills, malaise, myalgia, arthralgia, headache, sweating, fatigue, nausea, fever             | 7-day self-compiled diary card       | Data about any local and systemic adverse could not be extracted (adverse events reported only singularly)                                                                                                                                 |
| Greenberg [15]     | Oral temp.<br>None: <37.7 °C<br>Mild: ≥37.7 to <38 °C<br>Moderate: ≥38 to <39 °C<br>Severe: ≥39 °C | Mild: Did not interfere with activity<br>Moderate: Interfered with activity<br>Severe: Prevented daily activity                                                                                                                                                 | Any local reaction among: ecchymosis, induration, redness, tenderness, pain | Any systemic reaction among: chills, malaise, myalgia, headache, nausea, fever                                            | 7-day self-compiled diary            | None                                                                                                                                                                                                                                       |

|                         |                                                                                                    |                                                                                                                                             |                                                                                                     |                                                                                                                                        |                                                                                      |                                                                                                                                                                                                               |
|-------------------------|----------------------------------------------------------------------------------------------------|---------------------------------------------------------------------------------------------------------------------------------------------|-----------------------------------------------------------------------------------------------------|----------------------------------------------------------------------------------------------------------------------------------------|--------------------------------------------------------------------------------------|---------------------------------------------------------------------------------------------------------------------------------------------------------------------------------------------------------------|
| Igari [57]              | Oral temp.<br>None: <37.7 °C<br>Mild: ≥37.7 to <38 °C<br>Moderate: ≥38 to <39 °C<br>Severe: ≥39 °C | Mild: Did not interfere with activity<br>Moderate: Interfered with activity<br>Severe: Prevented daily activity                             | Any local reaction among: ecchymosis, induration, redness, tenderness, pain                         | Any systemic reaction among: chills, malaise, myalgia, headache, nausea, fever                                                         | 7-day interview form card                                                            | None                                                                                                                                                                                                          |
| Ikematsu [16]           | Four-points scale<br>Grade 3: axillary temp. ≥39 °C<br>Grade 4: axillary temp. ≥40 °C              | Three points scale<br>Grade 3: symptoms that hindered normal daily activities.<br>The definitions of the other grades were not reported.    | Any local reaction among: swelling, redness, pain                                                   | Any systemic reaction among: fatigue, headache, joint pain, muscle ache, shivering, sweating and fever                                 | 7-day self-compiled diary card                                                       | Data about any local and systemic adverse could not be extracted (adverse events reported only singularly)                                                                                                    |
| Kung/Kao [17,18]        | Axillary temp. ≥38.5 °C                                                                            | NR                                                                                                                                          | Any local reaction among: ecchymosis, swelling, redness, pain, decreased limb mobility              | Any systemic reaction among: nasal congestion, cough, sore throat, headache, joint pain, muscle ache, nausea, vomiting, malaise, fever | 7-day self-compiled diary card                                                       | None                                                                                                                                                                                                          |
| Liang/Zhu/Wu [19,36,38] | Axillary temp.<br>Mild: 37.1-37.5 °C<br>Moderate: 37.6-39.0 °C<br>Severe: >39.0 °C                 | Mild: Did not interfere with activity<br>Moderate: Interfered with activity<br>Severe: Prevented daily activity                             | Any local reaction among: swelling, redness, pain, induration                                       | Any systemic reaction among: cough, headache, headache, myalgia, diarrhea, fatigue, fever                                              | Diary cards, spontaneous reports and hospital admission records throughout the study | Data on specific adverse events are not reported separately by vaccine group and age group (and could thus only be included in non age-stratified meta-analyses)                                              |
| Loebermann [20]         | Axillary temp. ≥38 °C                                                                              | Mild: Did not interfere with activity<br>Moderate: Caused some impairment<br>Severe: Affected daily activity and required medical attention | Any local reaction among: ecchymosis, erythema, induration, swelling, pain                          | Any systemic reaction among: chills/shivering, malaise, myalgia, arthralgia, headache, sweating, fatigue, fever                        | 3-day self-compiled diary card                                                       | Most of the unsolicited adverse events are not reported. Data about fever have not been reported, and data on any local and systemic adverse could not be extracted (adverse events reported only singularly) |
| Lu [21]                 | Axillary temp. ≥38 °C                                                                              | Mild: Did not interfere with activity<br>Moderate: Caused some impairment<br>Severe: Affected daily activity and required medical attention | Any local reaction among: soreness/pain, swelling, redness, ecchymosis and limitation of arm motion | Any systemic reaction among: nasal congestion, cough, sore throat, muscle aches, headache, vomiting, nausea and malaise                | 7-day self-compiled or compiled by parents diary card                                | None                                                                                                                                                                                                          |
| Madhun [22]             | Mild: 38.0-38.49 °C<br>Moderate: 38.5-38.99 °C<br>Severe: >39.0 °C                                 | Mild: Did not interfere with activity<br>Moderate: Caused some impairment<br>Severe: Affected daily activity and required medical attention | Any local reaction among: erythema/redness, itching, edema/swelling, pain, ecchymosis, induration   | Any systemic reaction among: fever, fatigue, headache, sweating, myalgia, diarrhea                                                     | 7-day self-compiled diary card                                                       | None                                                                                                                                                                                                          |
| Mallory [23]            | Axillary temp. ≥38.3 °C                                                                            | NR                                                                                                                                          | NR                                                                                                  | NR                                                                                                                                     | Diary card                                                                           | Data on pain are not reported. Data on any local adverse reaction could not be extracted (local adverse events reported only singularly)                                                                      |

|                    |                                                                                                                                               |                                                                                                                                                                                                  |                                                                                  |                                                                                                                                                                                                                                  |                                      |                                                                                                                                                                                                                 |
|--------------------|-----------------------------------------------------------------------------------------------------------------------------------------------|--------------------------------------------------------------------------------------------------------------------------------------------------------------------------------------------------|----------------------------------------------------------------------------------|----------------------------------------------------------------------------------------------------------------------------------------------------------------------------------------------------------------------------------|--------------------------------------|-----------------------------------------------------------------------------------------------------------------------------------------------------------------------------------------------------------------|
| Mironov 1,2 [24]   | NR                                                                                                                                            | NR                                                                                                                                                                                               | NR                                                                               | NR                                                                                                                                                                                                                               | NR                                   | The dosages of each arm have not been reported, thus data on adverse events could not be extracted                                                                                                              |
| Nicholson [25]     | Axillary temp. $\geq 38$ °C                                                                                                                   | Mild: Did not interfere with activity<br>Moderate: Caused some impairment<br>Severe: Affected daily activity and required medical attention                                                      | Any local reaction among: pain, redness, swelling, bruising                      | Any systemic reaction among: muscle aches, chills, malaise, headache, nausea, fever                                                                                                                                              | 7-day self-compiled diary card       | Data on adverse events are not reported separated by age groups and only for the second dose. Data on any local and systemic adverse reactions could not be extracted (adverse events reported only singularly) |
| Nolan [26]         | Mild: $\geq 37.5$ to $\leq 38.5$<br>Moderate: $> 38.5$ to $\leq 39.5$<br>Severe: $> 39.5$                                                     | Mild: Did not interfere with activity<br>Moderate: Caused some impairment<br>Severe: Affected daily activity and required medical attention                                                      | Any local reaction among: pain, redness, swelling                                | Any systemic reaction among: muscle aches, chills, malaise, headache, nausea, irritability, loss of appetite, diarrhea, fever                                                                                                    | 7-day diary compiled by parents      | None                                                                                                                                                                                                            |
| Oh [27]            | Axillary temp. $\geq 38$ °C                                                                                                                   | Mild: Did not interfere with activity<br>Moderate: Caused some impairment<br>Severe: Affected daily activity and required medical attention                                                      | Any local reaction among: pain, tenderness, redness and swelling                 | Any systemic reaction among: fever, headache, malaise, shivering, fatigue, sweating, myalgia and arthralgia (subjects $\geq 3$ years of age) or fever, irritability, crying, loss of appetite, vomiting, diarrhea and drowsiness | 7-day diary card compiled by parents | Data on any local and systemic adverse reactions could not be extracted (adverse events reported only singularly)                                                                                               |
| Plennevaux [28,29] | Grade 3: $> 39.5$ for infants aged 6-23 months, or $> 39.0$ °C for children aged 2-9 years. Definitions of the other grades were not reported | Three points scale<br>Grade 3: incapacitating, preventing usual activities. The definitions of the other grades were not reported.                                                               | Any local reaction among: tenderness, erythema, swelling, induration, ecchymosis | Any systemic reaction among: fever, vomiting, abnormal crying, drowsiness, lost of appetite, irritability                                                                                                                        | 7-day diary compiled by parents      | None                                                                                                                                                                                                            |
| Roman 1 [30]       | Axillary temp. $\geq 38$ °C                                                                                                                   | No effect on normal activities: Pain on touching site<br>Some interference with normal everyday activities: pain on moving limb<br>Prevents normal everyday activities: significant pain at rest | Any local reaction among: pain, redness, swelling                                | Any systemic reaction among: fatigue, headache, arthralgia, myalgia, shivering, sweating, fever                                                                                                                                  | 7-day self-compiled diary card       | Data on any local and systemic adverse reactions could not be extracted (adverse events reported only singularly)                                                                                               |
| Roman 2 [31]       | Grade 1: 38.0-38.5 °C<br>Grade 2: 38.51-39.0 °C<br>Grade 3: $> 39.0$ °C                                                                       | Grade 1: easily tolerated, pain on touch<br>Grade 2: interferes with normal activity, when limb is moved<br>Grade 3: prevents normal activity, significant pain at rest                          | Any local reaction among: pain, redness, swelling                                | Any systemic reaction among: fatigue, headache, arthralgia, myalgia, shivering, sweating, fever                                                                                                                                  | 7-day self-compiled diary card       | Data on any local and systemic adverse reactions could not be extracted (adverse events reported only singularly)                                                                                               |
| Roman 3 [39]       | Axillary temp. $\geq 38$ °C                                                                                                                   | NR                                                                                                                                                                                               | NR                                                                               | NR                                                                                                                                                                                                                               | NR                                   | The frequencies of fever, any local and systemic adverse reactions have not been reported                                                                                                                       |

|                 |                                     |                                                                                                                                             |                                                                                                  |                                                                                                                   |                                      |                                                                                                                                      |
|-----------------|-------------------------------------|---------------------------------------------------------------------------------------------------------------------------------------------|--------------------------------------------------------------------------------------------------|-------------------------------------------------------------------------------------------------------------------|--------------------------------------|--------------------------------------------------------------------------------------------------------------------------------------|
| Scheifele [58]  | Oral temp. $\geq 38.5$ °C           | Mild: Did not interfere with activity<br>Moderate: Caused some impairment<br>Severe: Affected daily activity and required medical attention | Any local reaction among: pain, redness, swelling                                                | Any systemic reaction among: irritability, drowsiness, sleep disturbance, decreased appetite, fever               | 7-day diary card compiled by parents | None                                                                                                                                 |
| Sun [32]        | NR                                  | NR                                                                                                                                          | NR                                                                                               | NR                                                                                                                | NR                                   | No data on adverse events have been reported                                                                                         |
| Talaat [33]     | NR                                  | Mild: Did not interfere with activity<br>Moderate: Caused some impairment<br>Severe: Affected daily activity and required medical attention | Any local reaction among: pain, erythema, induration, tenderness, ecchymosis                     | Any systemic reaction among: headache, malaise, myalgia, nausea, chills, vomit, fever                             | 7-day self-compiled diary card       | Data on adverse events have not been reported separately by age group (they have been used only in non age-stratified meta-analyses) |
| Vajo [34]       | Oral temp. $>38$ °C for $\geq 24$ h | Mild: transient or mild discomfort<br>Moderate: mild-to moderate limitation in activity<br>Severe: substantial limitation in activity       | Any local reaction among: pain, erythema, induration, ecchymosis                                 | Any systemic reaction among: headache, malaise, myalgia, shivering, fatigue, rash, fever                          | 7-day self-compiled diary card       | Data on adverse events were not reported separated by age groups                                                                     |
| Waddington [35] | Axillary temp. $\geq 38$ °C         | Mild: Did not interfere with activity<br>Moderate: Caused some impairment<br>Severe: Affected daily activity and required medical attention | Any local reaction among: pain, redness, swelling                                                | Any systemic reaction among: headache, malaise, myalgia, loss of appetite, fever                                  | 7-day diary card compiled by parents | Data on any systemic adverse reaction could not be extracted (systemic adverse events reported only singularly)                      |
| Yasuda [37]     | Axillary temp. $\geq 38$ °C         | Mild: Did not interfere with activity<br>Moderate: Caused some impairment<br>Severe: Affected daily activity and required medical attention | Any local reaction among: ecchymosis, erythema, induration, swelling, and pain at injection site | Any systemic reaction among: headache, arthralgia, chills, fatigue, malaise, myalgia, nausea, sweating, and fever | 7-day diary card compiled by parents | Data on any local and systemic adverse reactions could not be extracted (adverse events reported only singularly)                    |

NR: Not reported.
