# Supplementary material for: Meta-Analysis of the Immunogenicity and Tolerability of Pandemic Influenza A 2009 (H1N1) Vaccines
Source: PubMed Central journal article supplement (PMC3167852; doi:10.1371/journal.pone.0024384), 2011-09-06
Supplement: pone.0024384.s006.pdf [file pone.0024384.s006.pdf]

**Table S6. Rates of injection-site pain, fever, any systemic and local adverse event after one or two doses of 2009 H1N1 influenza vaccination, according to vaccine dose and formulation (presence or absence of an adjuvant). Data from single studies have been combined using proportion meta-analysis (random-effect model).**

| Formulations*                | Pain                  |      |                                         | Fever                |      |                                    | Any systemic adverse event |      |                                      | Any local adverse event |      |                                      |
|------------------------------|-----------------------|------|-----------------------------------------|----------------------|------|------------------------------------|----------------------------|------|--------------------------------------|-------------------------|------|--------------------------------------|
|                              | % (95%CI)             | N    | References                              | % (95%CI)            | N    | References                         | % (95%CI)                  | N    | References                           | % (95%CI)               | N    | References                           |
| <u>Non-adjuvanted</u>        |                       |      |                                         |                      |      |                                    |                            |      |                                      |                         |      |                                      |
| 7.5x1 – All                  | 20 (10-32)            | 985  | [12,21,27,33,35]                        | 4 (2-8)              | 985  | [12,21,27,33,35]                   | 32 (27-38)                 | 921  | [21,28,29,33]                        | 21 (5-44)               | 1378 | [21,28,29,33,35]                     |
| - Split-virus                | 17 (1-29)             | 525  | [12,21,27,33]                           | 2 (1-4)              | 525  | [12,21,27,33]                      | 32 (27-38)                 | 921  | [21,28,29,33]                        | 30 (20-42)              | 918  | [21,28,29,33]                        |
| - Whole-virus                | 27 (22-32)            | 460  |                                         | 7 (5-10)             | 460  |                                    | --                         | 0    |                                      | 1 (0-1)                 | 460  | [35]                                 |
| 7.5x2 – All                  | 26 (15-39)            | 1301 | [12,21,25,27,28,33,35]                  | 5 (3-8)              | 1362 | [12,21,25,27,28,33,35]             | 28 (13-47)                 | 1606 | [19,21,28,33]                        | 16 (1-44)               | 2052 | [19,21,28,33,35]                     |
| - Split-virus                | 25 (1-49)             | 683  | [12,21,27,28,33]                        | 5 (2-9)              | 744  | [12,21,27,28,33]                   | 28 (13-47)                 | 1606 | [19,21,28,33]                        | 23 (1-62)               | 1606 | [19,21,28,33]                        |
| - Whole-virus                | 28 (25-32)            | 618  |                                         | 6 (1-14)             | 618  |                                    | --                         | 0    |                                      | 1 (0-2)                 | 460  | [35]                                 |
| 15x1<br>(all split-virus)    | 30 (18-44)            | 1883 | [8,12,17,18,20,21,26,27,33,54,57]       | 3 (0-8)              | 1678 | [8,12,17,18,21,26,27,33,54,57]     | 31 (23-41)                 | 2334 | [8,17,18,19,21,26,28,29,33,38,54,57] | 31 (19-45)              | 2332 | [8,17,18,19,21,26,28,29,33,38,54,57] |
| 15x2<br>(all split-virus)    | 32 (23-42)            | 2238 | [8,11,12,15,17,18,21,26,27,28,33,38,54] | 5 (2-10)             | 2060 | [11,12,15,17,18,21,26,27,28,33,38] | 37 (26-49)                 | 5852 | [8,15,17,18,19,21,26,28,33,54]       | 39 (19-61)              | 5852 | [8,15,17,18,19,21,26,28,33,54]       |
| 21-30x1<br>(all split-virus) | 42 (27-58)            | 880  | [8,17,18,26,30,33,54]                   | 7 (0-22)             | 880  | [8,17,18,26,30,33,54]              | 35 (22-50)                 | 1497 | [8,17,18,26,29,33,38,54]             | 36 (18-56)              | 1497 | [8,17,18,26,29,33,38,54]             |
| 21-30x2<br>(all split-virus) | 32 (23-42)            | 1610 | [8,11,15,17,18,19,26,33,38,54]          | 8 (0-20)             | 1501 | [11,15,17,18,19,26,33,38]          | 42 (27-58)                 | 4574 | [11,15,17,18,19,26,33]               | 43 (19-68)              | 4574 | [8,15,17,18,19,26,33,54]             |
| <u>Adjuvanted</u>            |                       |      |                                         |                      |      |                                    |                            |      |                                      |                         |      |                                      |
| 1.88-5.25x1 – All            | 63 (44-79)            | 1899 | [9,12,22,30,31,34,35,37,55,58]          | 4 (1-9)              | 1780 | [9,12,22,30,31,34,35,37,55,58]     | 51 (15-86)                 | 869  | [9,22,34,58]                         | 37 (10-71)              | 1320 | [9,22,34,35,58]                      |
| - Aluminum                   | 7 (4-10) <sup>s</sup> | 355  | [34]                                    | 0 (0-1) <sup>s</sup> | 355  | [34]                               | 8 (5-11) <sup>s</sup>      | 355  | [34]                                 | 13 (10-17) <sup>s</sup> | 355  | [34]                                 |
| - Other adjuvants            | 68 (57-78)            | 1544 |                                         | 5 (2-10)             | 1425 |                                    | 67 (57-76)                 | 514  |                                      | 45 (8-86)               | 965  |                                      |
| 1.88-5.25x2 – All            | 66 (56-75)            | 1248 | [9,12,25,31,35,37,58]                   | 12 (2-29)            | 1129 | [9,12,25,31,35,37,58]              | 61 (15-97)                 | 402  | [9,19,58]                            | 29 (5-61)               | 832  | [9,19,35,58]                         |
| - Aluminum                   | --                    | 0    |                                         | --                   | 0    |                                    | 12 (6-20) <sup>s</sup>     | 101  | [19]                                 | 9 (4-16) <sup>s</sup>   | 101  | [19]                                 |
| - Other adjuvants            | 66 (56-75)            | 1248 | [9,12,25,31,35,37,58]                   | 12 (2-29)            | 1129 | [9,12,25,31,35,37,58]              | 84 (74-92)                 | 301  |                                      | 36 (5-77)               | 731  |                                      |
| 7.5x1 – All                  | 52 (31-72)            | 565  | [8,12,14,37,54,55]                      | 3 (0-8)              | 576  | [8,12,14,37,54,55]                 | 19 (3-43)                  | 582  | [8,14,38,54]                         | 28 (3-65)               | 583  | [8,14,38,54]                         |

|                   |            |     |                    |            |     |                    |            |     |           |            |     |           |
|-------------------|------------|-----|--------------------|------------|-----|--------------------|------------|-----|-----------|------------|-----|-----------|
| - Aluminum        | --         | 0   |                    | --         | 0   |                    | 1 (7-12)   | 440 | [38]      | 10 (7-13)  | 440 | [38]      |
| - Other adjuvants | 52 (31-72) | 565 | [8,12,14,37,54,55] | 3 (0-8)    | 576 | [8,12,14,37,54,55] | 25 (4-56)  | 142 |           | 40 (11-74) | 143 |           |
| 7.5x2 – All       | 59 (27-87) | 624 | [8,12,37,38,54]    | 9 (2-19)   | 578 | [12,37,38]         | 25 (5-53)  | 850 | [8,19,54] | 36 (6-75)  | 850 | [8,19,54] |
| - Aluminum        | 22 (18-26) | 440 | [38]               | 15 (11-18) | 440 | [38]               | 14 (11-17) | 743 | [19]      | 18 (16-21) | 743 | [19]      |
| - Other adjuvants | 71 (59-82) | 184 |                    | 5 (0-22)   | 88  |                    | 39 (30-49) | 107 |           | 57 (47-67) | 107 |           |
| 15x1***           | 84 (64-95) | 25  | [12]               | 4 (0-20)   | 576 | [12]               | 11 (8-14)  | 440 | [38]      | 12 (9-16)  | 440 | [38]      |
| 15x2****          | 20 (16-24) | 440 | [38]               | 15 (12-18) | 578 | [38]               | 14 (11-17) | 741 | [19]      | 17 (14-20) | 741 | [19]      |

N = total number of subject analyzed; CI = Confidence Intervals. \* 7.5x1 = Results collected after the first or single dose of 7.5 mcgs of hemagglutinin antigen; 7.5x2 = Results collected after the second dose of 7.5 mcgs of hemagglutinin antigen. \*\*\* Other adjuvants only. \*\*\*\* Aluminum only. <sup>s</sup>Whole-virus only.
