# Supplementary material for: Meta-Analysis of the Immunogenicity and Tolerability of Pandemic Influenza A 2009 (H1N1) Vaccines
Source: PubMed Central journal article supplement (PMC3167852; doi:10.1371/journal.pone.0024384), 2011-09-06
Supplement: pone.0024384.s007.pdf [file pone.0024384.s007.pdf]

**Table S7. Direct meta-analyses comparing the rates of pain at the injection site of H1N1 influenza vaccines at higher versus next lower doses of hemagglutinin antigen (HA) and of adjuvanted versus non-adjuvanted H1N1 influenza vaccines. All doses are reported as µg of HA.**

| All ages                               | RR (95%CI)       | N    | References                     |
|----------------------------------------|------------------|------|--------------------------------|
| <u>Non-adjuvanted vaccines</u>         |                  |      |                                |
| 15 vs 7.5 - One dose only              | 1.19 (0.82-1.71) | 858  | [12,33]                        |
| 30 vs 15 - One dose only               | 1.14 (0.87-1.49) | 1743 | [8,18,26,33,54]                |
| All dosages * - One dose only          | 1.10 (0.91-1.32) | 2200 | [8,12,18,26,33,54]             |
| 15 vs 7.5 - Two doses                  | 0.99 (0.83-1.18) | 1164 | [12,28,33]                     |
| 30 vs 15 - Two doses                   | 1.20 (0.98-1.47) | 3274 | [8,11,15,18,26,33,38,54]       |
| All dosages * - Two doses              | 1.13 (0.98-1.30) | 4037 | [8,11,12,15,18,26,28,33,38,54] |
| <u>Adjuvanted vaccines</u>             |                  |      |                                |
| 7.5 vs 1.88-5.25 - One dose only       | 1.17 (1.00-1.38) | 366  | [12,37,55]                     |
| 15 vs 7.5 - One dose only              | 1.15 (0.86-1.54) | 51   | [12]                           |
| All dosages * - One dose only          | 1.15 (0.99-1.33) | 391  | [12,37,55]                     |
| 7.5 vs 1.88-5.25 - Two doses           | 1.27 (1.02-1.57) | 152  | [12,37]                        |
| 15 vs 7.5 - Two doses                  | 0.90 (0.70-1.16) | 880  | [38]                           |
| All dosages * - Two doses              | 1.01 (0.75-1.37) | 1362 | [12,37,38]                     |
| <u>Adjuvanted vs non-adjuvanted</u>    |                  |      |                                |
| 7.5 - One dose only                    | 2.03 (1.15-3.60) | 51   | [12]                           |
| 15 - One dose only                     | 2.10 (1.26-3.50) | 50   | [12]                           |
| All dosages * - One dose only          | 2.58 (1.71-3.87) | 232  | [12,39]                        |
| 7.5 - Two doses                        | 2.03 (1.15-3.60) | 51   | [12]                           |
| 15 - Two doses                         | 1.83 (1.32-2.54) | 880  | [38]                           |
| All dosages * - Two doses              | 1.79 (0.92-3.48) | 1832 | [12,38,39]                     |
| <u>Stratification by adjuvant type</u> |                  |      |                                |
| Same dosage - One dose only *          |                  |      |                                |
| Aluminum                               | --               | 0    |                                |
| MF-59                                  | 2.07 (1.41-3.03) | 101  | [12]                           |
| AS03 <sub>(A or B)</sub>               | 3.68 (2.38-5.69) | 131  | [39]                           |
| Same dosage - Two doses *              |                  |      |                                |
| Aluminum                               | 1.19 (0.51-2.77) | 1650 | [38]                           |
| MF-59                                  | 2.03 (1.15-3.60) | 51   | [12]                           |
| AS03 <sub>(A or B)</sub>               | 3.68 (2.38-5.69) | 131  | [39]                           |

N = total number of subject analyzed; RR= Random-effect risk ratio; CI = Confidence Intervals. \* The total sample of overall meta-analyses may be lower (higher) than the sum of stratified meta-analyses because some arms had to be split to be included in more than a stratified meta-analysis (some arms were different from the main comparisons shown in the Table).
