# Supplementary material for: Meta-Analysis of the Immunogenicity and Tolerability of Pandemic Influenza A 2009 (H1N1) Vaccines
Source: PubMed Central journal article supplement (PMC3167852; doi:10.1371/journal.pone.0024384), 2011-09-06
Supplement: pone.0024384.s008.pdf [file pone.0024384.s008.pdf]

**Table S8. Direct meta-analyses comparing the rates of fever of H1N1 influenza vaccines at higher versus next lower doses of hemagglutinin antigen (HA) and of adjuvanted versus non-adjuvanted H1N1 influenza vaccines. All doses are reported as µg of HA.**

| All ages                               | RR (95%CI)        | N    | (References)              |
|----------------------------------------|-------------------|------|---------------------------|
| <u>Non-adjuvanted vaccines</u>         |                   |      |                           |
| 15 vs 7.5 - One dose only              | 0.89 (0.33-2.43)  | 858  | [12,33]                   |
| 30 vs 15 - One dose only               | 1.71 (1.28-2.28)  | 1743 | [8,18,26,33,54]           |
| All dosages * - One dose only          | 1.65 (1.24-2.19)  | 2200 | [8,12,18,26,33,54]        |
| 15 vs 7.5 - Two doses                  | 0.89 (0.51-1.56)  | 1281 | [12,28,33]                |
| 30 vs 15 - Two doses                   | 1.40 (1.14-1.72)  | 2997 | [11,15,18,26,33,38]       |
| All dosages * - Two doses              | 1.32 (1.09-1.61)  | 3877 | [11,12,15,18,26,28,33,38] |
| <u>Adjuvanted vaccines</u>             |                   |      |                           |
| 7.5 vs 1.88-5.25 - One dose only       | 1.35 (0.45-4.04)  | 387  | [12,37,55]                |
| 15 vs 7.5 - One dose only              | 3.12 (0.13-73.06) | 51   | [12]                      |
| All dosages * - One dose only          | 1.38 (0.49-3.87)  | 512  | [12,37,55]                |
| 7.5 vs 1.88-5.25 - Two doses           | 0.97 (0.36-2.59)  | 173  | [12,37]                   |
| 15 vs 7.5 - Two doses                  | 1.06 (0.78-1.46)  | 880  | [38]                      |
| All dosages * - Two doses              | 0.91 (0.69-1.20)  | 1383 | [12,37,38]                |
| <u>Adjuvanted vs non-adjuvanted</u>    |                   |      |                           |
| 7.5 - One dose only                    | --                | 0    |                           |
| 15 - One dose only                     | 3.00 (0.13-70.30) | 50   | [12]                      |
| All dosages * - One dose only          | 3.00 (0.13-70.30) | 101  | [12]                      |
| 7.5 - Two doses                        | 0.32 (0.01-7.53)  | 51   | [12]                      |
| 15 - Two doses                         | 1.05 (0.76-1.43)  | 880  | [38]                      |
| All dosages * - Two doses              | 0.81 (0.53-1.25)  | 1701 | [12,38]                   |
| <u>Stratification by adjuvant type</u> |                   |      |                           |
| Same dosage - One dose only *          |                   |      |                           |
| Aluminum                               | --                | 0    |                           |
| MF-59                                  | 3.00 (0.13-70.30) | 101  | [12]                      |
| AS03 <sub>(A or B)</sub>               | --                | 0    |                           |
| Same dosage - Two doses *              |                   |      |                           |
| Aluminum                               | 0.83 (0.51-1.33)  | 1650 | [38]                      |
| MF-59                                  | 0.32 (0.01-7.53)  | 51   | [12]                      |
| AS03 <sub>(A or B)</sub>               | --                | 0    |                           |

N = total number of subject analyzed; RR= Random-effect risk ratio; CI = Confidence Intervals. \* The total sample of overall meta-analyses may be lower (higher) than the sum of stratified meta-analyses because some arms had to be split to be included in more than a stratified meta-analysis (some arms were different from the main comparisons shown in the Table).
