# Supplementary material for: Meta-Analysis of the Immunogenicity and Tolerability of Pandemic Influenza A 2009 (H1N1) Vaccines
Source: PubMed Central journal article supplement (PMC3167852; doi:10.1371/journal.pone.0024384), 2011-09-06
Supplement: pone.0024384.s009.pdf [file pone.0024384.s009.pdf]

**Table S9. Direct meta-analyses comparing the rates of any systemic adverse event of H1N1 influenza vaccines at higher versus next lower doses of hemagglutinin antigen (HA) and of adjuvanted versus non-adjuvanted H1N1 influenza vaccines. All doses are reported as µg of HA.**

| All ages                               | RR (95%CI)       | N     | (References)             |
|----------------------------------------|------------------|-------|--------------------------|
| <u>Non-adjuvanted vaccines</u>         |                  |       |                          |
| 15 vs 7.5 - One dose only              | 1.00 (0.87-1.16) | 1718  | [28,29,33]               |
| 30 vs 15 - One dose only               | 1.08 (0.90-1.29) | 3115  | [8,18,26,29,33,38]       |
| All dosages * - One dose only          | 1.06 (0.93-1.21) | 4183  | [8,18,26,28,29,33,38,54] |
| 15 vs 7.5 - Two doses                  | 1.22 (0.85-1.75) | 6693  | [19,28,33]               |
| 30 vs 15 - Two doses                   | 1.22 (1.07-1.38) | 10100 | [8,15,18,19,26,33,54]    |
| All dosages * - Two doses              | 1.22 (1.07-1.39) | 11852 | [8,15,18,19,26,28,33,54] |
| <u>Adjuvanted vaccines</u>             |                  |       |                          |
| 7.5 vs 1.88-5.25 - One dose only       | --               | 0     |                          |
| 15 vs 7.5 - One dose only              | 1.15 (0.77-1.72) | 880   | [38]                     |
| All dosages * - One dose only          | 1.02 (0.72-1.46) | 1210  | [38]                     |
| 7.5 vs 1.88-5.25 - Two doses           | 1.17 (0.67-2.04) | 844   | [19]                     |
| 15 vs 7.5 - Two doses                  | 1.00 (0.78-1.29) | 1484  | [19]                     |
| All dosages * - Two doses              | 1.08 (0.85-1.36) | 1915  | [19]                     |
| <u>Adjuvanted vs non-adjuvanted</u>    |                  |       |                          |
| 7.5 - One dose only                    | --               | 0     |                          |
| 15 - One dose only                     | 0.87 (0.60-1.26) | 880   | [38]                     |
| All dosages * - One dose only          | 0.72 (0.49-1.05) | 1650  | [38]                     |
| 7.5 - Two doses                        | 1.36 (1.05-1.77) | 1665  | [19]                     |
| 15 - Two doses                         | 0.81 (0.67-0.97) | 5281  | [19]                     |
| All dosages * - Two doses              | 0.93 (0.72-1.21) | 11157 | [15,19]                  |
| <u>Stratification by adjuvant type</u> |                  |       |                          |
| Same dosage - One dose only *          |                  |       |                          |
| Aluminum                               | 0.72 (0.49-1.05) | 1650  | [38]                     |
| MF-59                                  | --               | 0     |                          |
| AS03 <sub>(A or B)</sub>               | --               | 0     |                          |
| Same dosage - Two doses *              |                  |       |                          |
| Aluminum                               | 0.91 (0.73-1.13) | 11157 | [15,19]                  |
| MF-59                                  | --               | 0     |                          |
| AS03 <sub>(A or B)</sub>               | --               | 0     |                          |

N = total number of subject analyzed; RR= Random-effect risk ratio; CI = Confidence Intervals. \* The total sample of overall meta-analyses may be lower (higher) than the sum of stratified meta-analyses because some arms had to be split to be included in more than a stratified meta-analysis (some arms were different from the main comparisons shown in the Table).
