# Supplementary material for: Meta-Analysis of the Immunogenicity and Tolerability of Pandemic Influenza A 2009 (H1N1) Vaccines
Source: PLoS One. 2011 Sep 6;6(9):e24384. doi: 10.1371/journal.pone.0024384 (PMC3167852; doi:10.1371/journal.pone.0024384)
Supplement: Table S10 — Direct meta-analyses comparing the rates of any local adverse event of H1N1 influenza vaccines at higher versus next lower doses of hemagglutinin antigen (HA) and of adjuvanted versus non-adjuvanted H1N1 influenza vaccines. All doses are reported as µg of HA. (PDF) [file pone.0024384.s010.pdf]

**Table S10. Direct meta-analyses comparing the rates of any local adverse event of H1N1 influenza vaccines at higher versus next lower doses of hemagglutinin antigen (HA) and of adjuvanted versus non-adjuvanted H1N1 influenza vaccines. All doses are reported as µg of HA.**

| All ages                               | RR (95%CI)        | N     | (References)             |
|----------------------------------------|-------------------|-------|--------------------------|
| <u>Non-adjuvanted vaccines</u>         |                   |       |                          |
| 15 vs 7.5 - One dose only              | 1.00 (0.71-1.40)  | 1713  | [28,29,33]               |
| 30 vs 15 - One dose only               | 1.09 (0.96-1.23)  | 3113  | [8,18,26,29,33,38,54]    |
| All dosages * - One dose only          | 1.05 (0.93-1.19)  | 4178  | [8,18,26,28,29,33,38,54] |
| 15 vs 7.5 - Two doses                  | 1.59 (0.72-3.54)  | 6693  | [19,28,33]               |
| 30 vs 15 - Two doses                   | 1.21 (1.03-1.42)  | 10100 | [8,15,18,19,26,33,54]    |
| All dosages * - Two doses              | 1.20 (0.96-1.51)  | 11576 | [15,18,19,26,28,33]      |
| <u>Adjuvanted vaccines</u>             |                   |       |                          |
| 7.5 vs 1.88-5.25 - One dose only       | --                | 0     |                          |
| 15 vs 7.5 - One dose only              | 1.29 (0.88-1.88)  | 880   | [38]                     |
| All dosages * - One dose only          | 1.31 (0.96-1.79)  | 1210  | [38]                     |
| 7.5 vs 1.88-5.25 - Two doses           | 2.05 (1.08-3.90)  | 884   | [19]                     |
| 15 vs 7.5 - Two doses                  | 0.93 (0.75-1.16)  | 1484  | [19]                     |
| All dosages * - Two doses              | 1.45 (0.87-2.42)  | 1915  | [19]                     |
| <u>Adjuvanted vs non-adjuvanted</u>    |                   |       |                          |
| 7.5 - One dose only                    | --                | 0     |                          |
| 15 - One dose only                     | 2.08 (1.33-3.25)  | 880   | [38]                     |
| All dosages * - One dose only          | 2.49 (1.74-3.57)  | 1650  | [38]                     |
| 7.5 - Two doses                        | 169 (23.7-1204)   | 1665  | [19]                     |
| 15 - Two doses                         | 2.91 (2.39-3.55)  | 5281  | [19]                     |
| All dosages * - Two doses              | 4.91 (2.35-10.25) | 10917 | [19]                     |
| <u>Stratification by adjuvant type</u> |                   |       |                          |
| Same dosage - One dose only *          |                   |       |                          |
| Aluminum                               | 2.49 (1.74-3.57)  | 1650  | [38]                     |
| MF-59                                  | --                | 0     |                          |
| AS03 <sub>(A or B)</sub>               | --                | 0     |                          |
| Same dosage - Two doses *              |                   |       |                          |
| Aluminum                               | 4.91 (2.35-10.25) | 10917 | [19]                     |
| MF-59                                  | --                | 0     |                          |
| AS03 <sub>(A or B)</sub>               | --                | 0     |                          |

N = total number of subject analyzed; RR= Random-effect risk ratio; CI = Confidence Intervals. \* The total sample of overall meta-analyses may be lower (higher) than the sum of stratified meta-analyses because some arms had to be split to be included in more than a stratified meta-analysis (some arms were different from the main comparisons shown in the Table).
